# Supplementary material for: Cooperative breakups induced by drop-to-drop interactions in one-dimensional flows of drops against micro-obstacles
Source: Royal Society of Chemistry journal article supplement (doi:10.1039/c4sm02036g), 2015-01-01
Supplement: c4sm02036g1.pdf [file c4sm02036g1.pdf]

## **Electronic Supplementary Information (ESI) – Cooperative breakups induced by drop-to-drop interactions in one-dimensional flows of drops against micro-obstacles**

Alexandre Schmit, Louis Salkin, Laurent Courbin, and Pascal Panizza

*IPR, UMR CNRS 6251, Campus Beaulieu, Université Rennes 1, 35042 Rennes, France*

### ***Caption of Movies S1–S3 illustrating cooperative breakups***

A periodic train of monodisperse slugs collides with a linear obstacle of length  $L = 700\text{ }\mu\text{m}$ . One observes cooperative effects: breakup events in which the size of the daughter slugs is either constant after a transient state (regime ①) or becomes a function of time (period  $T \geq 2$ ). As shown in the movies, the size of the slugs, their speed, and the inter-slug distance are: Movie S1 (regime ①)  $L_d = 310\text{ }\mu\text{m}$ ,  $v = 8350\text{ }\mu\text{m/s}$ , and  $\lambda = 720\text{ }\mu\text{m}$ , Movie S2 ( $T = 2$ )  $L_d = 330\text{ }\mu\text{m}$ ,  $v = 13200\text{ }\mu\text{m/s}$ , and  $\lambda = 1410\text{ }\mu\text{m}$ , Movie S3 ( $T = 4$ )  $L_d = 320\text{ }\mu\text{m}$ ,  $v = 8750\text{ }\mu\text{m/s}$ , and  $\lambda = 760\text{ }\mu\text{m}$ .

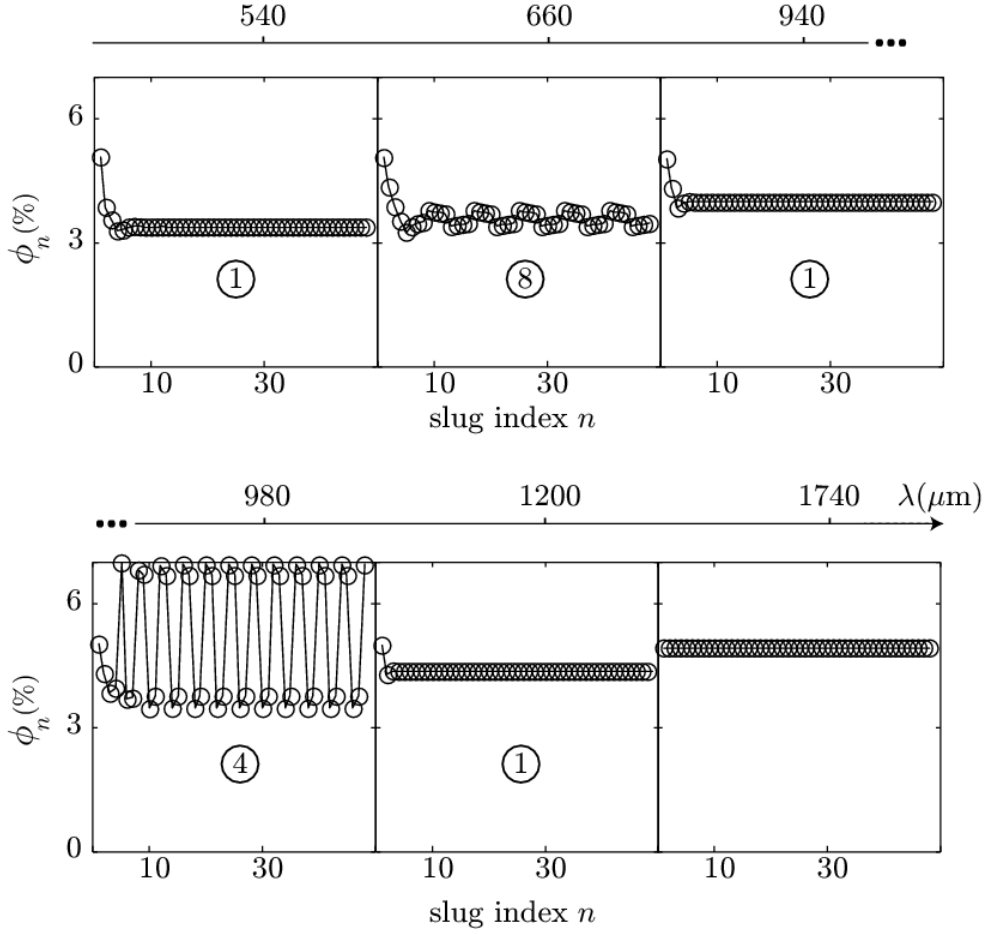

***Caption of Figure S1 – An illustration of the diversity of cooperative breakup regimes obtained numerically when a periodic assembly of drops collides with a rectangular micro-obstacle***

Shown are sequences of breakup events obtained numerically when assemblies of regularly-spaced slugs collide with a rectangular micro-obstacle. For each of these sequences, we plot the variations of the volume fraction  $\phi_n$  with the index of the mother drop  $n$ . For large enough capillary numbers, we observe cooperative effects: periodic breakup events in which  $\phi_n$  is a function of time. As shown, the period of periodic regimes depends on the inter-slug distance  $\lambda$ . The size of the slugs, the capillary number, and the length of the obstacle are  $L_d = 280 \mu\text{m}$ ,  $C = 2.3 \cdot 10^{-3}$ , and  $L = 700 \mu\text{m}$ , respectively. Other geometric parameters and fluid properties are identical to those provided in the text.
